# Supplementary material for: Immune function biomarkers in children exposed to lead and organochlorine compounds: a cross-sectional study
Source: PubMed Central journal article supplement (PMC1097747; doi:10.1186/1476-069x-4-5), 2005-04-14
Supplement: 1476-069X-4-5-S1.pdf [file 1476-069X-4-5-S1.pdf]

|                                                      | DDE (µg/L)     |           |           |       | Sum of PCBs (µg/L) |           |           |       | HCB (µg/L)     |          |           |       | γ-HCH (µg/L)   |      |       | Pb (µg/L)      |           |           |       |
|------------------------------------------------------|----------------|-----------|-----------|-------|--------------------|-----------|-----------|-------|----------------|----------|-----------|-------|----------------|------|-------|----------------|-----------|-----------|-------|
| Cells                                                | ≤ 0.2          | 0.21-0.29 | 0.30-0.43 | >0.43 | ≤0.30              | 0.31-0.48 | 0.49-0.75 | >0.75 | ≤0.15          | 0.16-0.2 | 0.21-0.27 | >0.27 | 0.01           | 0.02 | >0.02 | <22.0          | 22.1-28.3 | 28.4-34.1 | >34.1 |
| N                                                    | 78             | 89        | 79        | 85    | 80                 | 86        | 82        | 83    | 84             | 77       | 86        | 84    | 91             | 130  | 110   | 82             | 81        | 86        | 82    |
| <b>T-cells (CD3+)</b>                                |                |           |           |       |                    |           |           |       |                |          |           |       |                |      |       |                |           |           |       |
| Total‡ crude                                         | 2193           | 2183      | 2139      | 2242  | 2286               | 2179      | 2144      | 2156  | 2289           | 2170     | 2155      | 2146  | 2131           | 2212 | 2213  | 2318           | 2101      | 2160      | 2184  |
| Adjusted §                                           | 1950           | 2005      | 1980      | 2076  | 2092               | 1998      | 1990      | 1932  | 2082           | 1975     | 1986      | 1968  | 1967           | 2020 | 2021  | 2118           | 1919*     | 1979      | 1999  |
|                                                      | F-test: p=0.71 |           |           |       | F-test: p=0.74     |           |           |       | F-test: p=0.76 |          |           |       | F-test: p=0.77 |      |       | F-test: p=0.17 |           |           |       |
| <b>T-helper cells CD3+CD4+</b>                       |                |           |           |       |                    |           |           |       |                |          |           |       |                |      |       |                |           |           |       |
| Total ‡ crude                                        | 1204           | 1209      | 1205      | 1251  | 1276               | 1212      | 1198      | 1189  | 1293           | 1190     | 1209      | 1180  | 1155           | 1232 | 1255  | 1297           | 1182      | 1203      | 1192  |
| Adjusted §                                           | 1087           | 1138      | 1147      | 1200  | 1183               | 1145      | 1141      | 1100  | 1220           | 1113     | 1139      | 1100  | 1101           | 1150 | 1176  | 1214           | 1106      | 1128      | 1123  |
|                                                      | F-test: p=0.51 |           |           |       | F-test: p=0.83     |           |           |       | F-test: p=0.37 |          |           |       | F-test: p=0.37 |      |       | F-test: p=0.24 |           |           |       |
| <b>Cytotoxic T-cells (CD3+CD8+)</b>                  |                |           |           |       |                    |           |           |       |                |          |           |       |                |      |       |                |           |           |       |
| Total‡ crude                                         | 753            | 743       | 727       | 778   | 773                | 740       | 739       | 752   | 769            | 744      | 740       | 751   | 750            | 753  | 748   | 799            | 711       | 746       | 750   |
| Adjusted §                                           | 660            | 665       | 649       | 692   | 697                | 660       | 668       | 642   | 678            | 658      | 662       | 669   | 671            | 669  | 659   | 712            | 634*      | 661       | 662   |
|                                                      | F-test: p=0.78 |           |           |       | F-test: p=0.80     |           |           |       | F-test: p=0.97 |          |           |       | F-test: p=0.93 |      |       | F-test: p=0.23 |           |           |       |
| <b>Memory T-helper cells (CD4+CD45RO+)</b>           |                |           |           |       |                    |           |           |       |                |          |           |       |                |      |       |                |           |           |       |
| Total‡ crude                                         | 315            | 249       | 352       | 325   | 316                | 277       | 308       | 325   | 265            | 349      | 311       | 307   | 331            | 274  | 325   | 317            | 304       | 327       | 341   |
| Adjusted §                                           | 332            | 323       | 363       | 362   | 343                | 342       | 347       | 347   | 354            | 363      | 345       | 317   | 348            | 341  | 345   | 358            | 321       | 348       | 351   |
|                                                      | F-test: p=0.18 |           |           |       | F-test: p=1.00     |           |           |       | F-test: p=0.34 |          |           |       | F-test: p=0.91 |      |       | F-test: p=0.22 |           |           |       |
| <b>Natural killer cells (CD16+CD56+)</b>             |                |           |           |       |                    |           |           |       |                |          |           |       |                |      |       |                |           |           |       |
| Total‡ crude                                         | 384            | 367       | 350       | 372   | 382                | 378       | 350       | 364   | 369            | 362      | 394       | 348   | 328            | 395  | 373   | 371            | 348       | 365       | 389   |
| Adjusted §                                           | 371            | 338       | 334       | 362   | 378                | 366       | 317       | 345   | 326            | 348      | 390       | 342   | 322            | 368* | 305*  | 350            | 322       | 354       | 378   |
|                                                      | F-test: p=0.48 |           |           |       | F-test: p=0.24     |           |           |       | F-test: p=0.16 |          |           |       | F-test: p<0.01 |      |       | F-test: p=0.20 |           |           |       |
| <b>Natural killer cells subset (CD16+CD56+CD57+)</b> |                |           |           |       |                    |           |           |       |                |          |           |       |                |      |       |                |           |           |       |
| Total‡ crude                                         | 156            | 153       | 148       | 148   | 159                | 156       | 142       | 147   | 155            | 144      | 164       | 142   | 137            | 162  | 151   | 154            | 148       | 148       | 156   |
| Adjusted §                                           | 168            | 157       | 158       | 162   | 177                | 171       | 142       | 156   | 148            | 153      | 183       | 162   | 143            | 175* | 167   | 162            | 152       | 161       | 169   |
|                                                      | F-test: p=0.89 |           |           |       | F-test: p=0.21     |           |           |       | F-test: p=0.18 |          |           |       | F-test: p=0.03 |      |       | F-test: p=0.69 |           |           |       |
| <b>B-cells (CD3+CD5+CD19+)</b>                       |                |           |           |       |                    |           |           |       |                |          |           |       |                |      |       |                |           |           |       |
| Total‡ crude                                         | 457            | 474       | 456       | 468   | 463                | 461       | 464       | 469   | 473            | 482      | 458       | 446   | 445            | 474  | 469   | 505            | 423       | 462       | 469   |
| Adjusted §                                           | 378            | 398       | 382       | 393   | 369                | 372       | 395       | 416   | 420            | 411      | 375       | 349   | 371            | 395  | 397   | 418            | 353*      | 389       | 393   |
|                                                      | F-test: p=1.00 |           |           |       | F-test: p=0.67     |           |           |       | F-test: p=0.26 |          |           |       | F-test: p=0.53 |      |       | F-test: p=0.10 |           |           |       |

‡ absolute number of subtype cells/µL based on percent of lymphocytes x total lymphocyte count.

\*  $p \leq 0.05$  based on a t-test compared with the lowest exposure category as the reference.

§ Adjusted for all exposures in the table (OC & Pb) in addition to gender, age, number of infections in the last 12 months, passive smoke exposure in the child's home in the last 12 months and lipids (sum of cholesterol and triglycerides)
