# Supplementary material for: Immune function biomarkers in children exposed to lead and organochlorine compounds: a cross-sectional study
Source: PubMed Central journal article supplement (PMC1097747; doi:10.1186/1476-069x-4-5), 2005-04-14
Supplement: 1476-069X-4-5-S2.pdf [file 1476-069X-4-5-S2.pdf]

|             | DDE (µg/L)     |           |           |       | Sum of PCBs (µg/L) |           |           |       | HCB (µg/L)     |          |           |       | γ-HCH (µg/L)   |      |       | Pb (µg/L)      |           |           |       |
|-------------|----------------|-----------|-----------|-------|--------------------|-----------|-----------|-------|----------------|----------|-----------|-------|----------------|------|-------|----------------|-----------|-----------|-------|
| Outcome     | ≤0.2           | 0.21-0.29 | 0.30-0.43 | >0.43 | ≤ 0.30             | 0.31-0.48 | 0.49-0.75 | >0.75 | ≤ 0.15         | 0.16-0.2 | 0.21-0.27 | >0.27 | 0.01           | 0.02 | >0.02 | <22.0          | 22.1-28.3 | 28.4-34.1 | >34.1 |
| N           | 78             | 89        | 79        | 85    | 80                 | 86        | 82        | 83    | 84             | 77       | 86        | 84    | 91             | 130  | 110   | 82             | 81        | 86        | 82    |
| IgG (mg/dL) |                |           |           |       |                    |           |           |       |                |          |           |       |                |      |       |                |           |           |       |
| Crude       | 1121           | 1116      | 1102      | 1159  | 1168               | 1105      | 1103      | 1125  | 1159           | 1147     | 1090      | 1106  | 1121           | 1111 | 1144  | 1122           | 1112      | 1151      | 1112  |
| Adjusted §  | 1177           | 1197      | 1199      | 1295* | 1229               | 1187      | 1217      | 1232  | 1246           | 1266     | 1196      | 1160  | 1221           | 1204 | 1224  | 1210           | 1214      | 1241      | 1201  |
|             | F-test: p=0.14 |           |           |       | F-test: p=0.78     |           |           |       | F-test: p=0.29 |          |           |       | F-test: p=0.84 |      |       | F-test: p=0.83 |           |           |       |
| IgA (mg/dL) |                |           |           |       |                    |           |           |       |                |          |           |       |                |      |       |                |           |           |       |
| Crude       | 128            | 136       | 140       | 134   | 148                | 135       | 124       | 133   | 149            | 138      | 128       | 124   | 139            | 135  | 131   | 129            | 126       | 139       | 146   |
| Adjusted §  | 112            | 125       | 138*      | 141*  | 141                | 127       | 119       | 127   | 145            | 134      | 126       | 111*  | 130            | 131  | 125   | 123            | 121       | 133       | 136   |
|             | F-test: p=0.05 |           |           |       | F-test: p=0.34     |           |           |       | F-test: p=0.08 |          |           |       | F-test: p=0.71 |      |       | F-test: p=0.27 |           |           |       |
| IgM (mg/dL) |                |           |           |       |                    |           |           |       |                |          |           |       |                |      |       |                |           |           |       |
| Crude       | 122            | 121       | 125       | 123   | 125                | 122       | 115       | 131   | 126            | 129      | 124       | 114   | 123            | 118  | 129   | 125            | 116       | 129       | 120   |
| Adjusted §  | 148            | 146       | 153       | 147   | 134                | 138       | 144       | 184*  | 160            | 164      | 151       | 123*  | 153            | 142  | 150   | 150            | 143       | 153       | 148   |
|             | F-test: p=0.92 |           |           |       | F-test: p<0.01     |           |           |       | F-test: p<0.01 |          |           |       | F-test: p=0.42 |      |       | F-test: p=0.74 |           |           |       |
| IgE (kU/l)  |                |           |           |       |                    |           |           |       |                |          |           |       |                |      |       |                |           |           |       |
| Crude       | 23             | 27        | 33        | 51    | 28                 | 34        | 28        | 39    | 26             | 32       | 31        | 43    | 30             | 32   | 35    | 31             | 20        | 46        | 45    |
| Adjusted §  | 30             | 37        | 53        | 80*   | 48                 | 53        | 41        | 45    | 49             | 51       | 43        | 45    | 41             | 49   | 51    | 46             | 30        | 59        | 59    |
|             | F-test: p=0.02 |           |           |       | F-test: p=0.84     |           |           |       | F-test: p=0.95 |          |           |       | F-test: p=0.59 |      |       | F-test: p=0.03 |           |           |       |

\*  $p \leq 0.05$  based on a t-test compared with the lowest exposure category as the reference.

§ Adjusted for all exposures in the table (OC & Pb) in addition to gender, age, number of infections in the last 12 months, passive smoke exposure in the child's home in the last 12 months and lipids (sum of cholesterol and triglycerides)
